# Supplementary material for: Toxofilin upregulates the host cortical actin cytoskeleton dynamics facilitating Toxoplasma invasion
Source: Oxford University Press journal article supplement (doi:10.1242/jcs.103648), 2012-01-01
Supplement: jcs103648figss1-s5.pdf [file jcs103648figss1-s5.pdf]

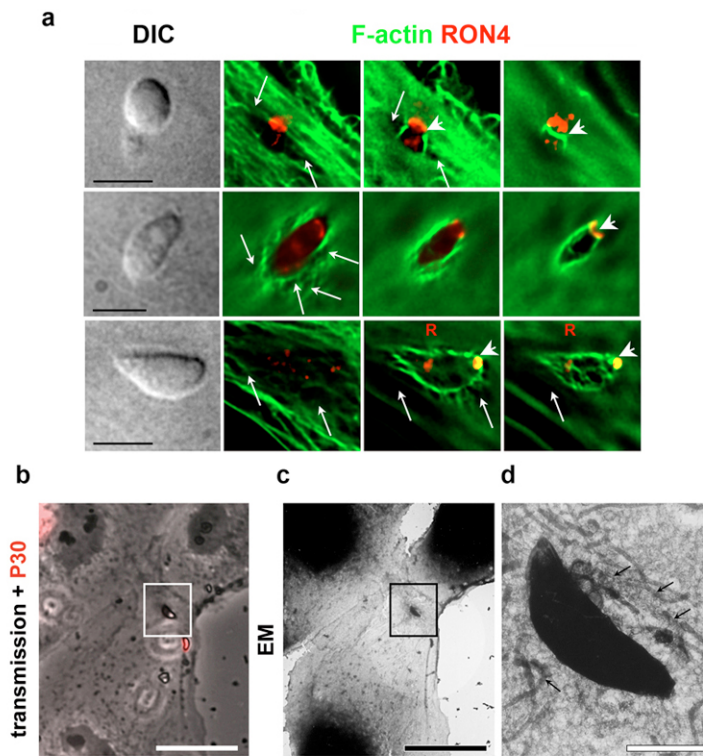

**Fig. S1. Fluorescence microscopy and correlative fluorescence and transmission electron microscopy of invading and internalized tachyzoites in Ptk1 cells.** (A) Confocal microscopy of host cell F-actin (green) at the site of entering parasites for 3 different planes. The RON4 labeling (red) delineates the zoite-cell junction (white arrowhead) and stains the rhoptries. Scale bar, 5 mm. (B) Overlay of P30 fluorescence image (red) and a phase contrast image. Scale bar, 30 mm. (C) Transmission electron micrograph of the same field of view as shown in b. (D) High resolution electron micrograph of fully-internalized tachyzoite identified by the absence of P30 fluorescence in b. Scale bar, 2 mm. Black arrows indicate the accumulation of endoplasmic reticulum in the vicinity of the parasite.

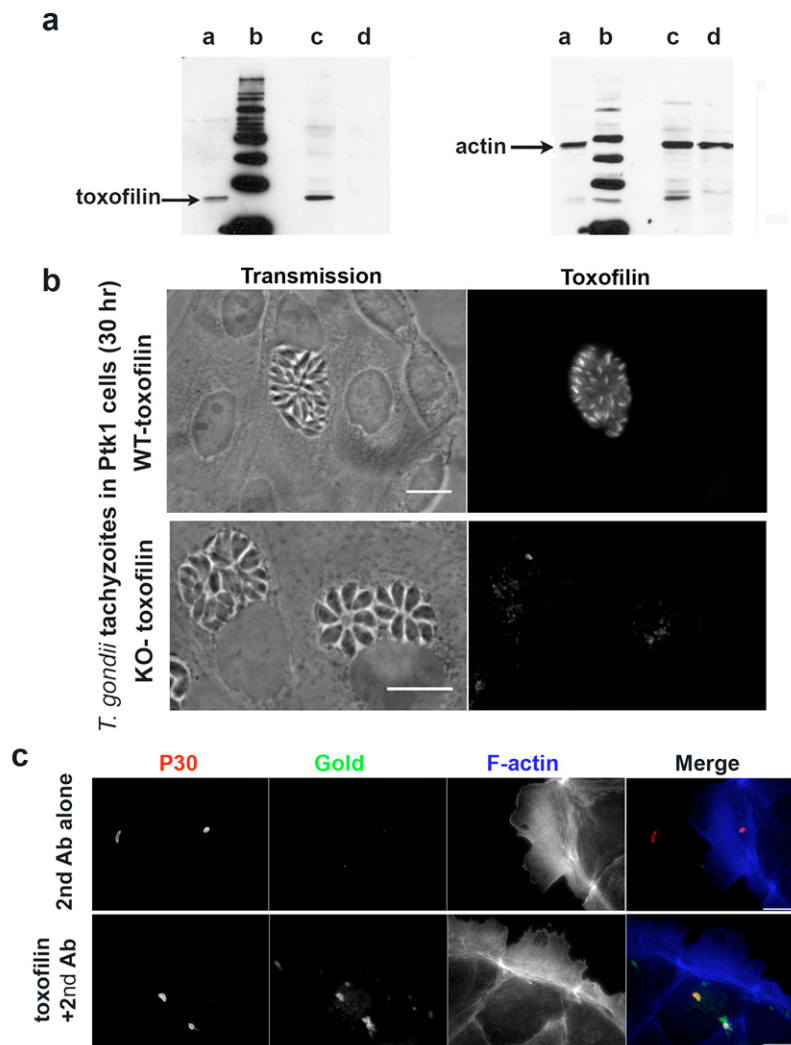

**Fig. S2. Toxofilin signals visualized by immunofluorescence and immunogold microscopy are specific.** (A) Western blot of total extract of free WT-toxofilin tachyzoites ( $10^6$ ) (lane a) and HFF cells ( $\sim 2 \times 10^5$ ) infected with WT-toxofilin (lane c) and KO toxofilin (lane d) tachyzoites; lane b presents the molecular weight markers. The membrane was probed first using the anti-toxofilin antibodies (left panel) and then anti-Tg actin antibodies (right panel) (B,C) Invasion assay was performed on PtK1 cells. (B) Toxofilin was detected using anti-toxofilin antibodies followed by Alexa Fluor 488. Scale bar, 10 mm. (C) Cells were prepared as for immunogold EM experiment. Extracellular tachyzoites were detected using anti-P30 antibodies and Alexa Fluor 568 anti-mouse secondary antibodies (shown in red in the merge column). Toxofilin was detected using anti-toxofilin antibodies followed by Alexa Fluor 488-15 nm gold anti-rabbit antibodies (shown in green in the merge column). In control, secondary Alexa Fluor 488-15 nm gold anti-rabbit antibodies were used alone without anti-toxofilin. F-actin was visualized with Alexa Fluor 350-phalloidin. Scale bar, 20 mm.

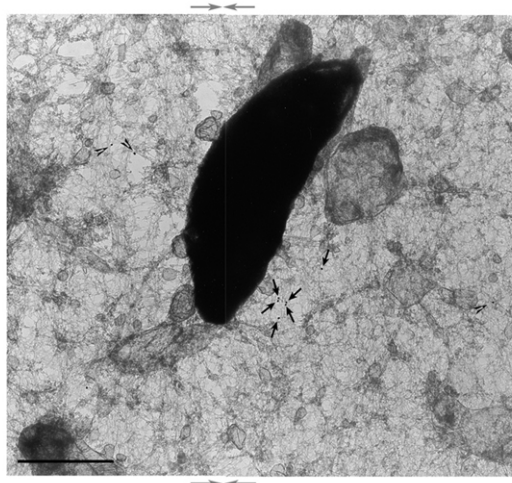

**Fig. S3. A larger field of view than that the one presented in Fig. 3A-E showing gold labeling of toxofilin at the onset of Ptk1 cell invasion by a tachyzoite.** The figure is reconstituted from 2 separate electron microscopy micrographs (see grey arrows at the edge of the figure) and shows that toxofilin secretion is specifically localized in the vicinity of the parasite. Scale bar, 1  $\mu$ m. The view is rotated by 20° counterclockwise from the view in Fig. 3A,B. The arrows point to the gold labels depicted in Fig. 3A-E. The three additional black arrowheads point to gold labels outside the field of view shown in Fig. 3.

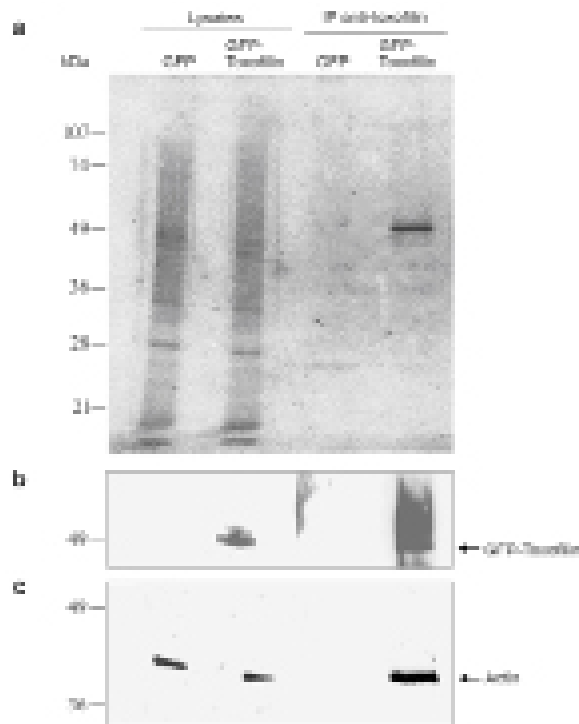

**Fig. S4. Toxofilin is phosphorylated when expressed in cells.** HeLa cells were transfected with GFP alone or GFP-toxofilin and labeled with  $^{32}$ P. Toxofilin was immunoprecipitated from cell lysates. **(A)** Radioactive scan of whole cell lysates and immunoprecipitation eluates. **(B)** Western blot using anti-Toxofilin. **(C)** Western-blot using anti-actin.

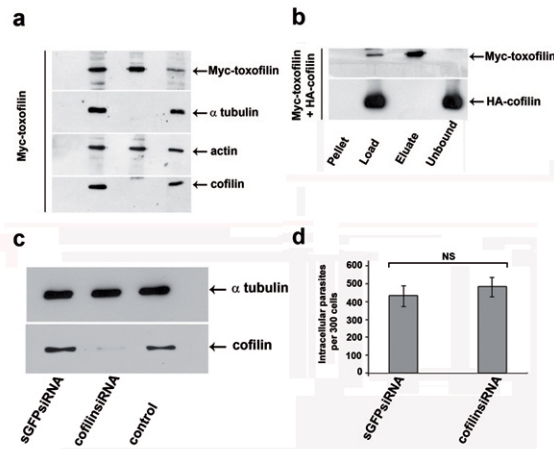

**Fig. S5. Toxofilin upregulates actin turnover independently of host cell cofilin.** HEK293 cells were transfected with myc-toxofilin (A), or with both myc-toxofilin and HA-cofilin (B) to detect putative partners. Lysates were subjected to immunoprecipitation using anti-myc antibodies. (A) Immunoprecipitation of toxofilin does not pull down endogenous cofilin, nor tubulin, but co-purifies with actin as expected. (B) Ectopically expressed HA-cofilin is not co-precipitating with myc-toxofilin. (C) HeLa cells were specifically silenced for cofilin as controlled using western blot, and (D) invasion assays were performed on control and silenced cells: no significant differences were observed in the number of infected cells ( $P>0.05$ , Student *t*-test).
